# Supplementary material for: Enhanced Charge Collection in MOF‐525–PEDOT Nanotube Composites Enable Highly Sensitive Biosensing
Source: PubMed Central journal article supplement (PMC5700651; doi:10.1002/advs.201700261), 2017-09-22
Supplement: ADVS-4-na-s001.pdf [file ADVS-4-na-s001.pdf]

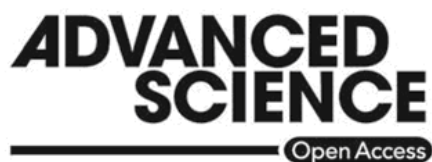

## Supporting Information

for *Adv. Sci.*, DOI: 10.1002/adv.201700261

Enhanced Charge Collection in MOF-525–PEDOT Nanotube Composites Enable Highly Sensitive Biosensing

*Tzu-Yen Huang, Chung-Wei Kung, Yu-Te Liao, Sheng-Yuan Kao, Mingshan Cheng, Ting-Hsiang Chang, Joel Henzie, Hatem R. Alamri, Zeid A. Alothman, Yusuke Yamauchi,\* Kuo-Chuan Ho,\* and Kevin C.-W. Wu\**

## Supporting Information

### **Enhanced Charge Collection in MOF-525-PEDOT Nanotube Composite Enable Highly Sensitive Biosensing**

*Tzu-Yen Huang, Chung-Wei Kung, Yu-Te Liao, Sheng-Yuan Kao, Mingshan Cheng, Ting-Hsiang Chang, Joel Henzie, Yusuke Yamauchi,\* Kuo-Chuan Ho\* and Kevin C.-W. Wu\**

#### **Interference test**

The amperometric response toward the addition of analyte was used to study the electrocatalytic oxidation of DA by the MOF-525-PEDOT NT nanocomposite electrode. The applied potential was set at 0.33 V with an electrode rotation speed of 1200 rpm. In **Figure S2**, the amperometric response of the MOF-525-PEDOT NT film was measured as a blank for the initial period of 100 s. After injecting 0.5 mM DA at 100 s, various interferents including 1.0 mM  $\text{NO}^{2-}$ , 1.0 mM  $\text{IO}^{3-}$ , 1.0 mM L-cys, 1.0 mM AA, 1.0 mM  $\text{H}_2\text{O}_2$  and 1.0 mM MeOH, were successively injected into the buffer solution. The current response for all interferents was less than 5%. It is also important to note that DA was injected to the solution after all additions of those interferents. The MOF-525-PEDOT NT film still showed a high catalytic selectivity toward DA. The results show that our sample has excellent sensing ability for DA in the presence of interferents and still had high selectivity toward the analyte.

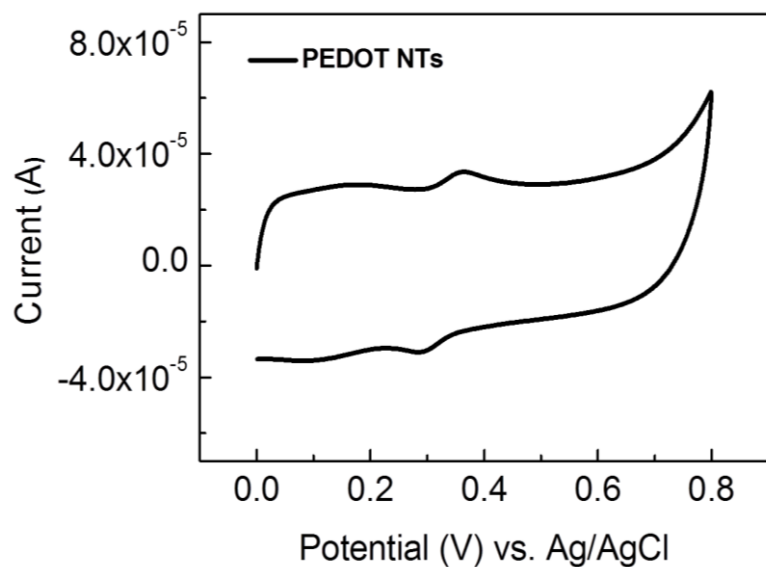

**Figure S1.** CV trace of the GCE modified with PEDOT NTs film in ABS containing 0.5 mM dopamine; scan rate:  $30 \text{ mV s}^{-1}$

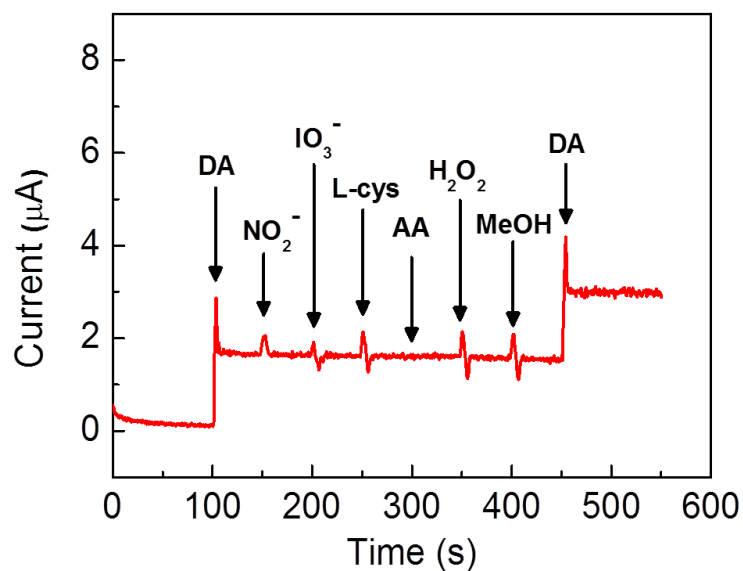

**Figure S2.** Interference test of the amperometric response of the MOF525-PEDOT NTs composite film in stirred ABS, with the injections of  $\text{NO}_2^-$ ,  $\text{IO}_3^-$ , L-cys, AA,  $\text{H}_2\text{O}_2$  and MeOH successively.

**Table S1.** Comparison of dopamine detection for the reported electrochemical sensors

| Modified electrodes                                             | Limit of detection ( $\mu\text{M}$ ) | Linear range ( $\mu\text{M}$ ) | pH  | Ref.                         |
|-----------------------------------------------------------------|--------------------------------------|--------------------------------|-----|------------------------------|
| Porphyrin-functionalized graphene                               | 0.01                                 | 0.01-70                        | 7.0 | [1]                          |
| Au@carbonds-chitosan                                            | 0.001                                | 0.1-30                         | 7.0 | [2]                          |
| Graphene                                                        | 2.64                                 | 4.0-100                        | 7.4 | [3]                          |
| Hollow nitrogen-doped carbon microspheres                       | 0.02                                 | 5-70                           | 7.0 | [4] <a href="#">ENREF 56</a> |
| Molecularly imprinted electropolymers @CuO                      | 0.008                                | 0.02-25                        | 7.5 | [5] <a href="#">ENREF 57</a> |
| Au-nanoclusters incorporated 3-amino-5-mercapto-1,2,4-triazole  | 0.05                                 | 0.6-340                        | 4.0 | [6]                          |
| Polyimidazole/graphene oxide copolymer                          | 0.63                                 | 12-278                         | 3.0 | [7]                          |
| Carbon functionalized metal organic framework/Nafion composites | 0.008                                | 0.03-10                        | 5.0 | [8]                          |
| SiO <sub>2</sub> -coated graphene oxide                         | 0.03                                 | 0.05-160                       | 7.0 | [9]                          |
| Graphene/poly-cyclodextrin/MWCNT                                | 0.05                                 | 0.15-21.65                     | 6.0 | [10]                         |
| Copper terephthalate metal-organic framework-graphene oxide     | 0.21                                 | 1-50                           | 5.0 | [11]                         |
| MOF-525-PEDOT NTs                                               | 0.04                                 | 2-270                          | 5.0 | This work                    |

## References

- [1] L. Wu, L. Feng, J. Ren, X. Qu, *Biosens. Bioelectron.* 2012, 34, 57.
- [2] Q. Huang, H. Zhang, S. Hu, F. Li, W. Weng, J. Chen, Q. Wang, Y. He, W. Zhang, X. Bao, *Biosens. Bioelectron.* 2014, 52, 277.
- [3] Y.-R. Kim, S. Bong, Y.-J. Kang, Y. Yang, R. K. Mahajan, J. S. Kim, H. Kim, *Biosens. Bioelectron.* 2010, 25, 2366.
- [4] C. Xiao, X. Chu, Y. Yang, X. Li, X. Zhang, J. Chen, *Biosens. Bioelectron.* 2011, 26, 2934.
- [5] B. Li, Y. Zhou, W. Wu, M. Liu, S. Mei, Y. Zhou, T. Jing, *Biosens. Bioelectron.* 2015, 67, 121.
- [6] C. Wang, R. Yuan, Y. Chai, Y. Zhang, F. Hu, M. Zhang, *Biosens. Bioelectron.* 2011, 30, 315.
- [7] X. Liu, L. Zhang, S. Wei, S. Chen, X. Ou, Q. Lu, *Biosens. Bioelectron.* 2014, 57, 232.
- [8] Y. Wang, H. Ge, G. Ye, H. Chen, X. Hu, *J. Mater. Chem. B* 2015, 3, 3747.
- [9] Y. Zeng, Y. Zhou, L. Kong, T. Zhou, G. Shi, *Biosens. Bioelectron.* 2013, 45, 25.
- [10] Y. Zhang, R. Yuan, Y. Chai, W. Li, X. Zhong, H. Zhong, *Biosens. Bioelectron.* 2011, 26, 3977.
- [11] X. Wang, Q. Wang, Q. Wang, F. Gao, F. Gao, Y. Yang, H. Guo, *ACS Appl. Mater. Interfaces* 2014, 6, 11573.
